# Supplementary material
Source: PubMed Central journal article supplement (PMC6600874)
Supplement: EMS83478-supplement-Supplementary_Table_1.pdf [file EMS83478-supplement-Supplementary_Table_1.pdf]

| IC | IC | F     | p        | $\eta_{\text{partial}}^2$ | t1    | p1   | t2    | p2   | t3    | p3       |
|----|----|-------|----------|---------------------------|-------|------|-------|------|-------|----------|
| 1  | 8  | 8.68  | 0.000306 | 0.13                      | 0.49  | 0.62 | -0.51 | 0.61 | -3.74 | 0.000428 |
| 1  | 10 | 6.89  | 0.001490 | 0.11                      | -0.05 | 0.96 | -1.26 | 0.21 | 2.41  | 0.019132 |
| 2  | 9  | 7.16  | 0.001166 | 0.11                      | -1.00 | 0.32 | -2.05 | 0.05 | 2.65  | 0.010487 |
| 2  | 16 | 10.85 | 0.000048 | 0.16                      | -0.89 | 0.38 | -0.51 | 0.61 | 4.51  | 0.000032 |
| 3  | 9  | 9.42  | 0.000161 | 0.14                      | -0.34 | 0.74 | -0.42 | 0.68 | 3.68  | 0.000518 |
| 3  | 10 | 14.54 | 0.000002 | 0.20                      | -2.75 | 0.01 | -1.44 | 0.15 | 3.47  | 0.000980 |
| 4  | 5  | 11.86 | 0.000021 | 0.17                      | -0.31 | 0.76 | -1.90 | 0.06 | 2.72  | 0.008697 |
| 4  | 12 | 6.42  | 0.002278 | 0.10                      | -0.52 | 0.61 | -0.90 | 0.37 | 2.07  | 0.043152 |
| 5  | 14 | 6.62  | 0.001894 | 0.10                      | -2.04 | 0.05 | -0.08 | 0.94 | 2.28  | 0.026209 |
| 7  | 12 | 8.51  | 0.000355 | 0.13                      | 0.11  | 0.91 | 1.28  | 0.20 | 5.19  | 0.000003 |
| 10 | 18 | 12.43 | 0.000013 | 0.18                      | -1.92 | 0.06 | -0.98 | 0.33 | 4.93  | 0.000007 |
| 11 | 27 | 8.56  | 0.000342 | 0.13                      | 0.22  | 0.83 | -0.21 | 0.84 | -3.75 | 0.000405 |
| 12 | 19 | 8.03  | 0.000543 | 0.12                      | -1.26 | 0.21 | -0.90 | 0.37 | 3.17  | 0.002454 |
| 13 | 16 | 7.75  | 0.000694 | 0.12                      | -2.01 | 0.05 | -0.05 | 0.96 | 3.03  | 0.003647 |
| 14 | 27 | 6.62  | 0.001900 | 0.10                      | 0.50  | 0.62 | -2.13 | 0.04 | 2.26  | 0.027408 |
| 16 | 17 | 8.81  | 0.000273 | 0.13                      | 0.91  | 0.36 | 0.52  | 0.60 | -4.19 | 0.000097 |
| 16 | 22 | 7.03  | 0.001313 | 0.11                      | 0.22  | 0.83 | 1.11  | 0.27 | -2.87 | 0.005647 |

  

|                   |                 |                          |                          |               |
|-------------------|-----------------|--------------------------|--------------------------|---------------|
| <b>FDR level:</b> | <b>0.002278</b> | <b>No</b>                | <b>No</b>                | <b>0.0432</b> |
|                   |                 | <b>significant edges</b> | <b>significant edges</b> |               |

**SI-Table 1: Results from the repeated measures ANOVA for the 17 edges showing a significant group x time interaction.**

FDR correction was applied to each test individually.
